1 **Title: *Legionella* protection and vaccination mediated by Mucosal**  
2 **Associated Invariant T (MAIT) cells**

3

4 **Authors:** Huimeng Wang<sup>1</sup>, Criselle D'Souza<sup>1,2</sup>, Xin Yi Lim<sup>1</sup>, Lyudmila Kostenko<sup>1</sup>, Troi  
5 J Pediongco<sup>1</sup>, Sidonia BG Eckle<sup>1</sup>, Bronwyn S Meehan<sup>1</sup>, Nancy Wang<sup>1</sup>, Shihan Li<sup>1</sup>,  
6 Ligong Liu<sup>3,4</sup>, Jeffrey YW Mak<sup>3,4</sup>, David P Fairlie<sup>3,4</sup>, Yoichiro Iwakura<sup>5</sup>, Jennifer M  
7 Gunnensen<sup>10</sup>, Andrew W Stent<sup>11</sup>, Jamie Rossjohn<sup>6,7,8</sup>, Glen P Westall<sup>9</sup>, Lars Kjer-  
8 Nielsen<sup>1</sup>, Richard A, Strugnell<sup>1</sup>, James McCluskey<sup>1\*</sup>, Alexandra J Corbett<sup>1</sup>, and Timothy  
9 SC Hinks<sup>1,12†</sup>, Zhenjun Chen<sup>1†</sup>

10 **Affiliations**

11 1. Department of Microbiology and Immunology, Peter Doherty Institute for Infection  
12 and Immunity, University of Melbourne, Parkville, Victoria 3000, Australia.

13 2. Centre for Animal Biotechnology, Faculty of Veterinary and Agricultural Sciences,  
14 University of Melbourne, Parkville, Victoria 3000, Australia.

15 3. Division of Chemistry and Structural Biology, Institute for Molecular Bioscience, The  
16 University of Queensland, Brisbane, Queensland 4067, Australia.

17 4. Australian Research Council Centre of Excellence in Advanced Molecular Imaging,  
18 The University of Queensland, Brisbane, Queensland 4067, Australia.

19 5. Center for Animal Disease Models, Research Institute for Biomedical Sciences, Tokyo  
20 University of Science, Chiba-ken 278-8510, Japan.

21 6. Infection and Immunity Program and The Department of Biochemistry and Molecular  
22 Biology, Biomedicine Discovery Institute, Monash University, Clayton, Australia.

23 7. Australian Research Council Centre of Excellence in Advanced Molecular Imaging,  
24 Monash University, Clayton, Victoria 3800, Australia

25 8. Institute of Infection and Immunity, Cardiff University, School of Medicine, Heath  
26 Park, CF14 4XN, Wales, UK

27 9. Allergy Immunology and Respiratory Medicine, Alfred Hospital, Melbourne, Victoria  
28 3004, Australia.

29 10. University of Melbourne, Anatomy and Neuroscience Department, Victoria 3000,  
30 Australia.

31 11. Faculty of Veterinary and Agricultural Sciences, University of Melbourne,  
32 Melbourne, Victoria 3000, Australia.

33 12. Respiratory Medicine Unit, Nuffield Department of Medicine Experimental  
34 Medicine, University of Oxford, OX3 9DU, Oxfordshire, UK

35 **Contact information:**

36 \* Corresponding author and lead contact: J McCluskey ([jamesm1@unimelb.edu.au](mailto:jamesm1@unimelb.edu.au))

37 **Additional title page footnotes:**

38 † These authors contributed equally to this work as joint senior authors.

39

40

41 **Abstract:**

42 Mucosal associated invariant T (MAIT) cells recognize conserved microbial metabolites  
43 from riboflavin synthesis. Striking evolutionary conservation and pulmonary abundance  
44 implicate them in antibacterial host defense, yet their roles in protection against clinically  
45 significant pathogens are unknown. Murine *Legionella* infection induced MR1-dependent  
46 MAIT cell activation and rapid pulmonary accumulation of MAIT cells associated with  
47 immune protection detectable in fully immunocompetent host animals. MAIT cell  
48 protection was more evident in mice lacking CD4<sup>+</sup> cells, whilst profoundly  
49 immunodeficient RAG2<sup>-/-</sup>γC<sup>-/-</sup> mice were substantially rescued from uniformly lethal  
50 *Legionella* infection by adoptively-transferred MAIT cells. This protection was  
51 dependent on MR1, IFN-γ and GM-CSF, but not IL-17, TNF-α or perforin. Protection  
52 was enhanced and observed earlier post-infection in mice that were Ag-primed to boost  
53 MAIT cells before infection. Our findings define a significant role for MAIT cells in  
54 protection against a major human pathogen and indicate a potential role for vaccination to  
55 enhance MAIT cell immunity.

56 **Key words**

57 Mucosal associated invariant T cell, T cell, infection, *Legionella*, MHC-related protein 1,  
58 IFN-gamma, intracellular, lung, human, mouse, riboflavin.

59

60 Mucosal-associated invariant T (MAIT) cells are innate-like lymphocytes with the  
61 potential to recognize a broad range of microbial pathogens. MAIT cells express a ‘semi-  
62 invariant’  $\alpha\beta$  T cell receptor (TCR) and recognize small molecules presented by the  
63 major histocompatibility complex (MHC) class I-related molecule (MR1)<sup>1,2</sup>. These  
64 molecules comprise derivatives of the riboflavin biosynthetic pathway<sup>3-5</sup>, which is  
65 conserved between a wide variety of bacteria, mycobacteria and yeasts<sup>3,6</sup>, but is absent  
66 from mammals, and therefore provides an elegant mechanism to discriminate host and  
67 pathogen. Indeed the enzymatic pathway required for riboflavin synthesis has been  
68 identified in all microbes shown to activate MAIT cells, and is absent in those that do  
69 not<sup>3</sup>.

70

71 A striking feature of MAIT cell immunity is the high level of conservation of MR1 across  
72 150 million years of mammalian evolution<sup>7-9</sup>, implying a strong evolutionary pressure to  
73 maintain the MAIT cell compartment. Furthermore, MAIT cells have a strong pro-  
74 inflammatory phenotype<sup>10</sup> and are abundant in humans in blood and lung tissue<sup>11</sup>, whilst  
75 in C57BL/6 mice are found in greater abundance in the lungs than any other organs<sup>12</sup>.  
76 Together these features implicate MAIT cells in a critical role in respiratory host defense.  
77 However, very few pathogens have been demonstrated *in vivo* to cause activation and  
78 proliferation of MAIT cells<sup>13,14</sup>. In studies implicating a role for MAIT cells in protective  
79 immunity against pathogens, the definition of these cells was limited by the lack of MR1-  
80 Ag tetramers<sup>14</sup>. To date no studies have clearly defined a functional role for MAIT cells  
81 in protection against a clinically important human pathogen.

82

83 Using a model of bacterial lung infection with the intracellular bacteria *Salmonella*  
84 *enterica* serovar Typhimurium we have previously shown that riboflavin gene-competent  
85 bacteria can cause rapid activation and proliferation of MAIT cells<sup>13</sup>. We therefore  
86 hypothesized that this response could also be elicited with an authentic human lung  
87 pathogen and would contribute to protection against disease.

88 *Legionella spp* are facultative intracellular pathogens, gram-negative, flagellated bacteria  
89 which, when inhaled, cause a spectrum of disease from self-limiting Pontiac fever to  
90 severe, necrotic pneumonia: Legionnaire's disease<sup>15</sup>. Incidence of Legionnaire's has  
91 nearly trebled since 2000, with >5000 cases/year in the USA, inflicting a 10% mortality  
92 despite best treatment<sup>16</sup>. In North America and Europe<sup>16</sup> the predominant pathogen is *L.*  
93 *pneumophila* whilst in Australasia and Thailand over 50% of cases are caused by *L.*  
94 *longbeachae*<sup>17</sup>.

95 Here we have used MR1 tetramers loaded with the potent MAIT cell ligand 5-(2-  
96 oxopropylideneamino)-6-D-ribitylaminouracil (5-OP-RU)<sup>18</sup> to specifically identify<sup>4</sup> and  
97 characterize MAIT cells in human *in vitro* and murine *in vivo* models of lung infection  
98 with the two most clinically significant *Legionella* species: *L. pneumophila* and *L.*  
99 *longbeachae*. Our data reveal that MAIT cells contribute to protection against fatal  
100 infection with *Legionella*, by a mechanism that is dependent on MR1 and interferon  
101 (IFN)- $\gamma$  / granulocyte macrophage-colony stimulating factor (GM-CSF). Protection is  
102 partial in immunocompetent hosts but becomes increasingly evident as other arms of  
103 immunity are disabled such as in CD4 T cell-deficient animals. Protection ultimately  
104 becomes "all or nothing" in profoundly immunodeficient mice RAG2<sup>-/-</sup> $\gamma$ C<sup>-/-</sup> mice. These

105 studies dissect the mechanisms by which MAIT cells contribute to protection against an  
106 important human disease and a model intracellular pathogen.

## 107 **Results**

### 108 **Human MAIT cells are activated by *Legionella* infection *in vitro* via MR1**

109 We<sup>3,13</sup> have previously shown that MAIT cells are activated by microbial species that  
110 express the riboflavin biosynthetic pathway; a finding which has been confirmed by  
111 others<sup>6</sup>. We therefore investigated whether *Legionella* species known to cause serious  
112 pulmonary infections in humans – *L. pneumophila*<sup>15,19</sup> and *L. longbeachae*<sup>17</sup> – and to  
113 express the necessary *rib* enzymes<sup>20</sup>, could activate human MAIT cells. First, bacterial  
114 lysates of *L. pneumophila* and *L. longbeachae* stimulated a reporter cell line expressing a  
115 MAIT TCR (Jurkat.MAIT-A-F7)<sup>3</sup> in the presence of an MR1-expressing lymphoid cell  
116 line (C1R.MR1)(Figure 1A). Stimulation was dose-dependent, and could be specifically  
117 blocked by anti-MR1 antibody<sup>21</sup>. Next we used a well-characterized human monocytic  
118 cell line (THP-1)<sup>22</sup> as an antigen presenting cell co-cultured with flow-sorted human  
119 peripheral blood CD3+V $\alpha$ 7.2+CD161+ cells. We observed activation of MAIT cells  
120 when co-cultured with THP1 cells infected for 27 hours with live *L. longbeachae* (Figure  
121 1B,C). Intracellular infection of wild type THP1 and THP-1:MR1+ cell lines induced  
122 expression of TNF- $\alpha$  by human MR1-5-OP-RU tetramer+ MAIT cells. Activation was  
123 related to the infective dose, and was specific to MAIT cells and not non-MAIT CD3+ T  
124 cells. Activation was MR1-dependent, as it did not occur in the presence of cells in which  
125 we had disrupted the MR1 gene using a CRISPR/Cas9 lentiviral system (THP1:MR1-).  
126 MAIT cells also expressed IFN- $\gamma$  in the presence of MR1-over-expressing cells

127 (THP1:MR1+), but expression was minimal using the parental cell line (THP1), which  
128 has very low constitutive surface expression of MR1.

129 To visualize MAIT cells *in situ* we infected healthy human lung tissue *ex vivo* with *L.*  
130 *longbeachae* and observed CD3+TCRV $\alpha$ 7.2+IL-18R $\alpha$ + MAIT cells within the lung  
131 parenchyma in the proximity of *Legionella* bacilli 24 hours post-infection using  
132 immunofluorescence microscopy (Figure 1D).

133 These findings indicate that *Legionella* induces potent MAIT cell immune responses *in*  
134 *vitro* suggesting that MAIT cells are likely to play a role in protection against *Legionella*  
135 pneumonia.

136

### 137 **MAIT accumulate in the lungs during *Legionella* infection *in vivo***

138 Next we examined the impact of *Legionella* infection on MAIT cells *in vivo* in a murine  
139 model using intranasal infection with live *L. longbeachae*. TCR $\beta$ + MR1-5-OP-RU  
140 tetramer+ cells were visible in the lung parenchyma using immunofluorescence  
141 microscopy within three days post-infection (Figure 2A). There was striking enrichment  
142 of pulmonary MAIT cells (from here on defined as CD45+TCR $\beta$ + MR1-5-OP-RU  
143 tetramer+ cells), which comprised up to 30% of all pulmonary  $\alpha\beta$ -T cells after 7 days  
144 (Figure 2B, C). MAIT cell accumulation was dependent on size of initial inoculum and  
145 was proportionately much larger for MAIT cells – 580-fold absolute increase at 10<sup>5</sup>  
146 colony-forming units (CFU) (P<0.0001) – than conventional  $\alpha\beta$ -T cells (maximum 9.4-  
147 fold, P<0.0001) (Figure 2C,D). Accumulation occurred rapidly over 7 days post infection  
148 (DPI), with absolute numbers peaking at day 10 (Figure 2E). Furthermore, despite a

149 subsequent 20-fold contraction from peak frequencies ( $P=0.005$ ), overall expansion of the  
150 MAIT cell population was long-lived, persisting  $>280$  DPI (Figure 2E,F). Interestingly,  
151 although MAIT cells have been implicated in recruitment of non MAIT T cells<sup>14</sup>, we did  
152 not observe any significant difference in pulmonary recruitment of  $\alpha\beta$ -T cells in MR1<sup>-/-</sup>  
153 mice, which have an absolute deficiency of MAIT cells<sup>12,13</sup>. Likewise, i.n. infection with  
154  $2 \times 10^7$  CFU *L. pneumophila* similarly induced a rapid expansion of MAIT cells  
155 (Supplementary Figure S1), although more modest than *L. longbeachae*. As C57BL/6  
156 mice are susceptible to *L. longbeachae*<sup>17</sup>, *L. longbeachae* was selected as the most  
157 appropriate model for more detailed investigation.

158

159 Histology of lungs from mice infected with  $2 \times 10^4$  CFU of *L. longbeachae* at 7DPI  
160 demonstrated pronounced alveolar infiltration of neutrophils and macrophages,  
161 leukocytoclasia, aggregates of fibrin and accumulation of edema fluid and epithelial  
162 shedding, consistent with the typical features of human *L. pneumophila*  
163 pneumonia<sup>15</sup> (Supplementary Figure S2A,B). Blinded analysis of these sections using a  
164 qualitative histological score at multiple time-points post infection revealed inflammation  
165 peaked at day 7, but there were no gross histological differences in the severity of  
166 pneumonia between C57BL/6 and MR1<sup>-/-</sup> mice (Supplementary Figure S2C). To  
167 determine the cellular localization of *L. longbeachae* we measured bacterial burden in  
168 flow-sorted cells from collagenase-dispersed murine lungs 3 days post infection. Most  
169 viable bacilli localized within neutrophils, but evidence of infection of macrophages and  
170 dendritic cells was also observed (Supplementary Figure S2D).

171



172 To explore MAIT cell function we investigated the dynamics of their cytokine profile  
173 throughout infection. During acute *L. longbeachae* infection MAIT cells secreted  
174 interleukin (IL)-17A, IFN- $\gamma$ , GM-CSF (Figure 3A, Supplementary Figure S3) and TNF- $\alpha$   
175 (data similar to IFN- $\gamma$ , not shown). Expression of IL-17A was abundant throughout the  
176 course of the infection, whilst IFN- $\gamma$  secretion was significantly higher during the acute  
177 infection than in naïve cells or after resolution (each  $P < 0.005$ , Figure 3B). Conversely,  
178 expression of GM-CSF was lowest during acute infection and peaked after disease  
179 resolution ( $P = 0.0006$  acute v resolution). This correlated with a shift in expression of  
180 nuclear transcription factors associated with Th1 or Th17 differentiation. In naïve mice  
181 most ( $81 \pm 4\%$ , mean  $\pm$ SD) MAIT cells expressed the orphan nuclear receptor, retinoic  
182 acid-related orphan receptor  $\gamma$ t (ROR $\gamma$ t) alone: a master regulator of Th17 cell  
183 differentiation (Figure 3C, 3D). A minority ( $13 \pm 4\%$ ) of cells expressed both ROR $\gamma$ t and  
184 the Th1 regulator T-bet, and very few expressed T-bet alone. However, during acute  
185 infection and long-term post infection there was a marked shift in phenotype towards  
186 predominant co-expression of ROR $\gamma$ t and T-bet in  $64 \pm 5\%$  and  $69 \pm 3\%$  of MAIT cells  
187 respectively. MAIT cells expressing T-bet alone were only observed at significant  
188 frequencies ( $14 \pm 3\%$ ) in acute infection. Thus the consistent secretion of IL-17A in all  
189 stages of infection and the transient increase of IFN- $\gamma$  secretion during acute infection  
190 reflect the changes in transcription factor profile we observed, suggesting the formation  
191 of an authentic memory pool of MAIT cells and pointing to a specific role for IFN- $\gamma$  in  
192 the acute response to infection.

193

194 **MAIT cell protection against life-threatening *Legionella* infection is enhanced and**  
195 **accelerated by prior boosting**

196

197 To determine whether MAIT cells contribute to immune protection against *Legionella* we  
198 compared bacterial burden in lungs of C57BL/6 and MR1<sup>-/-</sup> mice throughout infection.  
199 Bacterial load increased by 2.5 log over the initial inoculum, peaking at 3 days post-  
200 infection (3DPI). In normal C57BL/6 mice we observed a significant difference in  
201 bacterial load but not until days 10 and 14 post infection. This was of the order of one log  
202 in CFU, consistent with relatively impaired bacterial clearance in MAIT cell deficient,  
203 MR1<sup>-/-</sup> mice (Figure 4A,B).

204

205 In specific pathogen-free C57BL/6 mice baseline frequencies of MAIT cells are very  
206 low<sup>12,13</sup>, potentially due to lack of natural exposure to diverse environmental pathogens.  
207 We have previously shown that MAIT cells can be expanded *in vivo* by intranasal  
208 exposure to the MAIT cell ligand 5-OP-RU with a Toll-like receptor (TLR) agonist such  
209 as the TLR9 agonist CpG or TLR2 agonist S-[2,3-bis(palmitoyloxy)propyl] cysteine  
210 (Pam2Cys) to furnish a MAIT cell costimulus<sup>13</sup>. To understand whether MAIT cell  
211 vaccination might impact on protection observed against *Legionella* infection of the lung,  
212 we used this approach to specifically expand pulmonary MAIT cells one month prior to  
213 *Legionella* infection, without affecting conventional T cell frequencies (Figure 4C,D).  
214 Prior exposure to 5-OP-RU and CpG enhanced MAIT cell numbers in the lungs and was  
215 associated with protection against infection as reflected in a reduction in bacterial load in

216 C57BL/6 versus MR1<sup>-/-</sup> mice (compare Figures 4A, B to Supplementary Figure S4). This  
217 protective effect became apparent earlier than observed in wild type C57BL/6 mice with  
218 reduced CFU seen on days 5 and 7 post-infection and comparable on d10 post-infection  
219 (compare Figures 4A, B to Supplementary Figure S4), as MAIT cell numbers became  
220 indistinguishable in boosted and non-boosted mice (not shown). When a direct  
221 comparison was made between MR1<sup>-/-</sup> mice, C57BL/6 mice and C57BL/6 mice that had  
222 been boosted by 5-OP-RU and Pam2Cys, bacterial burden was significantly lower on  
223 days 5, 7 and 10 post-infection in wild-type mice that had received this prior MAIT cell  
224 boosting (Figure 4E). This demonstrates the potential to augment MAIT cell-mediated  
225 protection by the prior administration of synthetic ligands as a ‘vaccine’.

226 These data demonstrate that MAIT cells contribute actively to *Legionella* protection in  
227 the context of an intact immune system and that this protection is more rapid and of  
228 greater magnitude when mice are first vaccinated to expand MAIT cells before infectious  
229 challenge.

230

### 231 **MAIT cell-mediated protection is more apparent in immune deficient mice**

232 Studies of other intracellular pathogens have demonstrated high levels of functional  
233 redundancy in the ability of different lymphocytes subsets to control bacterial growth *in*  
234 *vivo*<sup>23</sup>. We hypothesized that by removing partially-redundant effects of other  
235 lymphocyte subsets, the protective effects of MAIT cells would become more apparent.  
236 CD4<sup>+</sup> T cell-derived IFN- $\gamma$  has been shown to play an essential role in achieving  
237 bacterial clearance of *Salmonella* Typhimurium<sup>23</sup>. We therefore used GK1.5 transgenic

238 mice, which express the anti-GK1.5 antibody and are CD4<sup>+</sup> T cell deficient<sup>24</sup>, and  
239 compared these with GK1.5.MR1<sup>-/-</sup> mice which lack both CD4<sup>+</sup> cells and MAIT cells.  
240 As expected, we observed a protective effect of MAIT cells through reduced bacterial  
241 burden apparent even earlier in the course of infection than with wild type mice  
242 (statistically significant by day 7 p.i) (Figure 4F).

243

244 To further unmask the potential of MAIT cells in protection, we removed additional  
245 layers of immunity by studying the impact of adoptively transferred MAIT cells into  
246 profoundly immunodeficient Rag2<sup>-/-</sup>γC<sup>-/-</sup> mice. We first expanded pulmonary MAIT cells  
247 by i.n. inoculation of donor mice with *S. Typhimurium* BRD509, as previously  
248 described<sup>13</sup>. Flow-sorted pulmonary MAIT cells from these mice were then adoptively  
249 transferred into recipient Rag2<sup>-/-</sup>γC<sup>-/-</sup> mice in which Rag2 and the common γ chain are  
250 deleted, leading to absence of T, B and NK cells. After transfer, administration of anti-  
251 CD4 and anti-CD8 mAbs was used to further deplete any residual contaminating  
252 conventional T cells (Figure 5A). After adoptive transfer, MAIT cells expanded  
253 spontaneously to generate a stable population by two weeks (Figure 5B, Supplementary  
254 Figure S5A) which expressed the nuclear transcription factor and master regulator of  
255 innate-like T cell development promyelocytic leukemia zinc finger(PLZF) (Figure S5B)  
256 <sup>25</sup>.

257

258 Strikingly, the presence of adoptively-transferred MAIT cells was sufficient to rescue  
259 completely Rag2<sup>-/-</sup>γC<sup>-/-</sup> mice from fatal infection with 10<sup>3</sup> CFU *L. longbeachae* (Figure

260 5C,  $X_2$   $P < 0.0001$ ) in the absence of other components of adaptive immunity. Using a  
261 higher inoculum ( $10^4$  CFU) we observed this protection was reduced by blockade with  
262 anti-MR1 mAb, which was associated with significantly reduced survival ( $X_2$   $P = 0.005$ )  
263 and with increased bacterial load amongst surviving mice ( $P = 0.0004$ ), consistent with an  
264 MR1-dependent mechanism (Figure 5D,E).

### 265 **MAIT cell-protection is dependent on IFN- $\gamma$**

266 To determine the mechanism by which MAIT cells provide this protection we used  
267 adoptive transfer of MAIT cells from mice with deficiencies in cytotoxic capability or in  
268 pro-inflammatory cytokines. The protective effect of MAIT cells on both survival of  
269 Rag2<sup>-/-</sup> $\gamma$ C<sup>-/-</sup> mice or on bacterial burden was not impaired in MAIT cells lacking the  
270 cytolytic proteins perforin or granzymes A and B, nor in MAIT cells unable to express  
271 IL-17A or TNF- $\alpha$  (Figure 6A,B). We observed a small increase in bacterial burden when  
272 transferred MAIT cells were deficient in GM-CSF (0.49 log-fold difference in CFU,  
273  $P = 0.026$ ), but this was not associated with significant differences in survival. By contrast  
274 protection was critically dependent on MAIT cell derived IFN- $\gamma$ , with decreased survival  
275 ( $P < 0.0001$ ) and a 2.8 log-fold increased bacterial burden ( $P < 0.001$ ) when MAIT cells  
276 were deficient in IFN- $\gamma$ . Furthermore these mice all succumbed to *Legionella* infection by  
277 day 37 p.i. .

278 The use of adoptive transfer of *in vivo* expanded MAIT cells provides compelling  
279 evidence that MAIT cells can confer protection against important human pathogens and  
280 demonstrates this protection depends upon their capacity to produce IFN- $\gamma$  and to a lesser  
281 extent GM-CSF.

282

## 283 **Discussion**

284 Our findings show that MAIT cells are activated and proliferate in response to *Legionella*  
285 infection, leading to enhanced immune protection *in vivo* that is dependent on IFN- $\gamma$  and  
286 GM-CSF. This protection is evident earlier and of greater magnitude if mice are first  
287 vaccinated to expand and prime MAIT cells which are otherwise present in small  
288 numbers in normal mice. Protection by MAIT cells is characterized by more rapid  
289 reduction in bacterial loads and is MR1-dependent suggesting mediation via antigen-  
290 specific activation. Remarkably, MAIT cell protection against *Legionella* was non-  
291 redundant and even evident in fully immune competent mice. The protective effect of  
292 MAIT cell immunity became more evident as layers of immunity were removed in host  
293 mice, firstly in GK1.5 mice lacking only CD4<sup>+</sup> T cells and then in more profoundly  
294 immunodeficient Rag<sup>2-/-</sup> $\gamma$ C<sup>-/-</sup> mice, lacking conventional T cells, B cells and NK cells. This  
295 observation is important given that studies of primary immunodeficiencies<sup>26</sup> imply  
296 redundancy of different lymphocyte subsets is a typical feature of pathogen immunity  
297 especially for innate mechanisms such as NK cells and innate lymphoid cells. Indeed, in  
298 the absence of B, T and NK cells MAIT cells were absolutely critical for survival in  
299 *Legionella*-infected mice revealing their important potential in compromised hosts. As  
300 this mechanism was dependent on MR1, which presents small molecules derived from  
301 riboflavin biosynthesis<sup>3-5</sup>, this demonstrates *in vivo* the potential for control of *Legionella*  
302 by detection of riboflavin metabolites.

303 These observations suggest how the contribution of MAIT cells to immune protection  
304 may be critical to survival in clinical, naturally-occurring severe infection. The mortality  
305 we observe from *Legionella* does not coincide with the time of peak bacterial load – on  
306 day 3 post-infection – but later, between days 6 and 14 post-infection, at which point  
307 MR1<sup>-/-</sup> mice had 0.78 to 1.1-log fold higher bacterial load than wild-type mice. In  
308 essence, MAIT cells may be the difference between life and death in knife-edge  
309 infections where host immunity is partially compromised by comorbidities or  
310 predisposing factors, or where patients are exposed to large bacterial doses.

311

312 Although MAIT cells have both cytotoxic activity<sup>27</sup> and the ability to rapidly produce  
313 pro-inflammatory cytokines including interleukin IL-17A, TNF- $\alpha$  and IFN- $\gamma$ <sup>10</sup>, the  
314 protective effect of MAIT cells against *Legionella* infection was not dependent on TNF- $\alpha$   
315 or IL-17A, but instead relied upon the capacity of MAIT cells to secrete IFN- $\gamma$  and GM-  
316 CSF. This is consistent with a study of *Francisella* infection<sup>28</sup> where GM-CSF reduces  
317 bacterial burden late in the course of infection, although this did not translate into a  
318 significant survival difference. Nor did the protective effect depend on the key cytotoxic  
319 effector molecules: perforin and granzymes A/B. This is in contrast to work suggesting  
320 MAIT cell cytotoxicity is important for control of *Shigella*-infected HeLa cell lines *in*  
321 *vitro*<sup>27</sup>.

322

323 As *Legionella* infects inflammatory cells, particularly neutrophils and macrophages,  
324 rather than epithelia, the essential immune function required of MAIT cells in our system

325 is likely the IFN- $\gamma$ -stimulated enhancement of bactericidal activity within these cells in  
326 which phagosome function has been subverted. Our findings of IFN- $\gamma$  production upon  
327 MAIT cell activation are consistent with other reports<sup>6,10,14,27</sup>, and accord with reports of  
328 a role for MAIT cell-derived IFN- $\gamma$  in limiting growth of *Francisella tularensis* in bone  
329 marrow-derived macrophages *in vitro*<sup>14</sup>. IFN- $\gamma$  has also been shown to enhance  
330 bactericidal activity of neutrophils via multiple mechanisms including enhancement of  
331 oxidative burst, nitric oxide production, antigen presentation, phagocytosis, and  
332 upregulation of CD80/86 co-stimulation and T cell-recruiting cytokines and  
333 chemokines<sup>29</sup>. Moreover, given that IFN- $\gamma$  is critical also for protection against  
334 mycobacterial disease including *M. tuberculosis (M.tb)*, it is likely that this early  
335 production of MAIT cell-derived IFN- $\gamma$  may be an important and non-redundant  
336 component of protection against mycobacteria. Indeed *in vitro* MAIT cell-derived IFN- $\gamma$   
337 inhibits growth of *Bacillus Calmette-Guerin (BCG)* in macrophages<sup>30</sup>, and the MR1-  
338 MAIT cell axis has been linked to susceptibility to BCG in mice<sup>30</sup> and to *M.tb* in  
339 humans<sup>31</sup> and mice<sup>32</sup>.

340

341 A striking feature of MAIT cell biology is the very low frequencies of MAIT cells we  
342 observe in blood or lungs in naïve mice<sup>12,13</sup>, in contrast to the marked and long-lived  
343 expansion induced by a single infection in our model. Although antigen-naïve MAIT  
344 cells have some intrinsic effector capacity<sup>33</sup>, the delay between initial microbial exposure  
345 and peak MAIT cell frequency may be critical in providing a window of opportunity for a  
346 pathogen to exploit<sup>14</sup>. This notion is consistent with our observation that MAIT cell  
347 protection can be accelerated by prior expansion of the pulmonary MAIT cell population



348 using intranasal synthetic 5-OP-RU and an appropriate TLR agonist. Notably, MAIT cell  
349 frequencies are low in early childhood<sup>34</sup>, suggesting the potential to enhance the  
350 immunogenicity of vaccines given in early life by incorporating such MAIT cell ligands  
351 in combination with TLR stimulation, which might for instance promote the recruitment  
352 of inflammatory monocyte differentiation via MAIT cell-derived GM-CSF<sup>28</sup>. A  
353 protective effect of expanding MAIT cells could contribute to heterologous protection  
354 afforded by neonatal BCG vaccination against other, unrelated classes of pathogens<sup>35</sup>.  
355 Vaccination with MAIT cell ligands might help resolve chronic infections where MAIT  
356 cell frequencies may be reduced due to other therapies<sup>11</sup>, comorbidities or activation  
357 induced cell death<sup>36</sup>.

358

359 Our findings define a significant role for MAIT cells in pulmonary host defense against a  
360 major human pathogen. We reveal layers of immunological redundancy likely to mask  
361 the contribution of MAIT cells in many situations of infectious challenge, but suggest a  
362 critical role for MAIT cells becomes apparent in a crisis situation – as reflected here in a  
363 high infecting inoculum, or in the face of compromised specific immunity – in which the  
364 gulf between survival and death is finely balanced. Moreover, we demonstrate the  
365 mechanism of this MAIT cell protection is IFN- $\gamma$  dependent and enhanced by GM-CSF.  
366 Due to the pleiotropic roles of IFN- $\gamma$  and the conservation of the riboflavin pathway  
367 across many species, this mechanism is likely broadly effective against other major  
368 human intracellular pathogens, and may prove as relevant to the later stages of infection  
369 as to the initial, acute phase characterized by innate immune responses countering rapid  
370 pathogen replication. We have shown this immunity can be augmented by exposure to

371 MR1 ligands suggesting this mechanism might have potential for preventive or  
372 therapeutic benefit.

373

## 374 **Materials and Methods**

### 375 *In vitro* activation assays

376 Jurkat cells expressing a MAIT TCR comprising the TRAV1-2-TRAJ33  $\alpha$ -chain  
377 and TRBV6-4  $\beta$ -chain (Jurkat.MAIT) were co-incubated at  $10^5$  cells per well in 96-well  
378 U-bottom plates with an equal number of class I reduced (C1R) antigen presenting cells  
379 (APCs) expressing MR1 (C1R.MR1)<sup>3</sup> for 16 h in RPMI-1640 media (Gibco) in  
380 supplement and 10% foetal calf serum (FCS)) (RF10) media at 37°C, 5%CO<sub>2</sub>. Cells were  
381 stimulated for 16 h with bacterial lysates prepared using repeated ultrasonication of  
382 bacteria in log-phase growth. Cells were stained with anti-CD3-APC and anti-CD69-PE  
383 Abs and 7AAD before flow cytometric analysis. Activation of Jurkat.MAIT cells was  
384 measured by an increase in surface CD69 expression.

385

386 For human MAIT cell assays, peripheral blood mononuclear cells (PBMCs) were  
387 stained with anti-CD3-PEAF594, CD161-PECy7, TCR V $\alpha$ 7.2 (TRAV1-2)-APC. V $\alpha$ 7.2+  
388 cells were enriched with anti-APC magnetic beads and the CD3+V $\alpha$ 7.2+CD161+  
389 population were isolated by flow cytometry and cultured at  $10^4$  cells/well for 16 or 36  
390 hours in penicillin-free media containing streptomycin and gentamicin with  $5 \times 10^4$  THP1  
391 cells which had been first infected for 3 hours (CD69 assays) or 27 hours (intracellular  
392 cytokine staining) with different multiplicities of infection (MOI) of live *L. longbeachae*  
393 NSW150. Control wells contained 5-OP-RU 10nM or *L. longbeachae* NSW150 at MOI  
394 100 which had been heat killed for 10 minutes at 67°C. CD69 upregulation was measured  
395 by surface staining for CD69-APCCy7 and 5-OP-RU loaded human MR1 tetramer-PE.  
396 For intracellular cytokine expression cells brefeldin A was added for the last 16 hours,

397 cells fixed, permeabilized (using BD Fixation/Permeabilization Kit (BD, Franklin Lakes,  
398 NJ) and stained with MR1 tetramer, CD3-PEAF594, Zombie yellow, IFN $\gamma$ -FITC, and  
399 TNF $\alpha$ -Pacific blue.

400

#### 401 Generation of THP1:MR1- cell line

402 THP1:MR1- cell lines were generated by targeted deletion of MR1 using  
403 LentiviralCRISPRv2 which was a gift from Feng Zhang (Addgene plasmid # 52961)<sup>37</sup>.  
404 The plasmid was digested with *BsmBI* (Fermentas), dephosphorylated and purified using  
405 gel electrophoresis and the Ultraclean DNA isolation kit (MO Bio laboratories, Carlsbad  
406 CA). Short guide RNAs (ACCTCTCATCATTGTGTAA) were ligated and the reaction  
407 product used to transform Stbl3 *E.Coli*. DNA was purified from transformed colonies  
408 (QIAprep spin miniprep) and used to transfect HEK293T cells with LentiviralCRISPRv2  
409 vector and packaging vectors. Supernatants were used to transduce parent THP1 cells and  
410 cells were selected using puromycin resistance and single cell sorting using anti-MR1  
411 antibody (8F2.F9) after upregulation of MR1 using acetyl-6FP. MR1 knockouts were  
412 then verified using surface staining and western blotting.

413

#### 414 Immunofluorescence microscopy

415 8  $\mu$ m sections of cryopreserved, unfixed lung tissue were submerged into ice-cold  
416 acetone for 10 min, air dried and then re-hydrated in PBS for 10 min. Endogenous biotin  
417 block was performed using Biotin/Avidin blocking kit (Thermo Fisher, Waltham MA)  
418 according to the manufacturer's instructions. Serum-free protein block (DAKO,  
419 Carpinteria, CA) was applied for 15 min, followed by 30 min blocking with 10% normal

420 donkey serum. Sections were subsequently blocked with Murine MR1-6FP tetramer (Nil  
421 PE) for 1 hour at room temperature. Murine MR1-5-OP-RU tetramer-PE (25 µg/ml in 2%  
422 bovine serum albumin/PBS) was applied for 1 h at room temperature in the dark, sections  
423 washed with PBS, fixed with 1% paraformaldehyde for 10 min, washed again and stained  
424 with a cocktail containing polyclonal rabbit anti-*Legionella* antibody (gift from Dr  
425 Hayley Newton, Department of Microbiology and Immunology, University of  
426 Melbourne) and Goat anti PE (KPL). After 1 hr, sections were washed and stained with  
427 Donkey anti Goat-AlexaFluor 568 (Life Technologies), Donkey-anti-Rabbit-DyLight 680  
428 (Life Technologies) and Alexa Fluor 647-conjugated Rat anti mouse TCR-β (Biolegend).  
429 Nuclei were counterstained with Hoechst 33342 (Life Technologies). Sections were  
430 mounted with Prolong Gold mounting medium (Life Technologies). Image acquisition  
431 was performed on Zeiss LSM 710 confocal microscope using Zen software (Zeiss,  
432 Oberkochen, Germany) The resultant images were further analysed using FIJI Image J  
433 software<sup>38</sup> (UW-Madison).

434

#### 435 Animal models

436 Mice were bred and housed in the Biological Research Facility of the Peter Doherty  
437 Institute (Melbourne, Victoria, Australia). MR1<sup>-/-</sup> mice were generated by breeding  
438 Va19iCa<sup>-/-</sup>MR1<sup>-/-</sup> mice<sup>39</sup> (from Susan Gilfillan, Washington University, St Louis School  
439 of Medicine, St Louis, MO) with C57BL/6 mice and inter-crossing of F1 mice. The  
440 genotype was determined by tail DNA PCR at the MR1 locus as previously described<sup>13</sup>.  
441 Granzyme A/B<sup>-/-</sup> and Perforin<sup>-/-</sup> mice were purchased from Joe Trapani (Victorian  
442 Comprehensive Cancer Centre, Melbourne). GK1.5 mice were crossed onto the MR1<sup>-/-</sup>

443 background to generate GK1.5.MR1<sup>-/-</sup> mice which lack CD4<sup>+</sup> cells and MAIT cells.  
444 Male mice aged 6–12 weeks were used in experiments, after approval by the University  
445 of Melbourne Animal Ethics Committee (1513661).

446

#### 447 Intranasal infection

448 Intranasal (i.n.) inoculation with *L. longbeachae* or antigens (76 pmol 5-OP-RU) and  
449 TLR agonist (either 20 mg CpG or 20nmol Pam2Cys) in 50 µl per nares was performed  
450 on isoflurane-anesthetized mice. For blocking experiments, mice were given 250 µg  
451 anti-MR1 (26.5 or 8F2.F9)<sup>21,40</sup> or isotype control mAbs in 200 µl PBS, once (i.v or  
452 intraperitoneally) 1 day prior to inoculation and three times (d1, d3, d5) post inoculation.  
453 Mice were killed by CO<sub>2</sub> asphyxia, the heart perfused with 10ml cold RPMI and lungs  
454 were taken.

455

456 To prepare single-cell suspensions lungs were finely chopped with a scalpel blade  
457 and treated with 3mg/ml-1collagenase III (Worthington, Lakewood, NJ), 5 µg/ml  
458 DNase, and 2% fetal calf serum in RPMI for 90 min at 37°C with gentle shaking. Cells  
459 were then filtered (70µm) and washed with PBS/2% foetal calf serum. Red blood cells  
460 were lysed with hypotonic buffer TAC (Tris-based amino chloride) for 5 min at 37°C.  
461 Approximately 1.5x10<sup>6</sup> cells were filtered (40µm) and used for flow cytometric analysis.

462

#### 463 Determination of bacterial counts in infected lungs.

464 Bacterial colonization was determined by counting colony-forming units (CFU)  
465 obtained from plating homogenized lungs in duplicate from infected mice (x5 per group)  
466 on buffered charcoal yeast extract agar containing 30µg/ml streptomycin and colonies  
467 counted after 4 days at 37°C under aerobic conditions.

468

#### 469 Adoptive transfer

470 As MAIT cell frequencies are low in naïve C57BL/6 mice, prior to adoptive transfer  
471 experiments MAIT cell populations were expanded by intranasal infection with 10<sup>6</sup> CFU  
472 *S. Typhimurium* BRD509 in 50µl PBS for 7 days as previously described<sup>13</sup>. After 7 days,  
473 mice were sacrificed, single cell suspensions prepared and live CD3+CD45+MR1-5-OP-  
474 RU tetramer+ cells sorted using a BD FACS Aria III. 10<sup>5</sup> MAIT cells were injected into  
475 the tail veins of recipient mice which then received 0.1 mg each of anti-CD4 (Gk1.5) and  
476 anti-CD8 (53.762) mAb i.p on days 2 and 5 or 6 to control residual conventional T cells.  
477 Mice were rested for 2 weeks post transfer to allow full expansion of the MAIT cell  
478 population prior to subsequent infectious challenge. Mice were weighed daily and  
479 assessed for visual signs of clinical disease, including inactivity, ruffled fur, labored  
480 breathing, and huddling behavior. Animals that had lost ≥20% of their original body  
481 weight and/or displayed evidence of pneumonia were euthanized.

482

#### 483 Statistical analysis

484 Statistical tests were performed using the Prism GraphPad software (version 7.0 La  
485 Jolla, CA). Comparisons between groups were performed using Student's t-tests or  
486 Mann-Whitney tests as appropriate unless otherwise stated. Survival curves were

487 compared using the Gehan-Breslow-Wilcoxon method for multiple groups. Flow  
488 cytometric data analysis was performed with FlowJo10 software (Ashland, OR).

#### 489 Reagents

490 Human peripheral blood mononuclear cells (PBMC) were obtained from the  
491 Australian Red Cross Blood Service (ARCBS) (University of Melbourne Human  
492 Research Ethics Committee 1239046.2). Healthy human lung explant tissue was obtained  
493 via the Alfred Lung Biobank program and ARCBS from organs not suitable for donation  
494 (Blood Service HREC 2014#14 and University of Melbourne Human Research Ethics  
495 Committee 1545566.1).

496

#### 497 Compounds, immunogens and tetramers

498 5-OP-RU was prepared as described previously<sup>18</sup>. CpG1688 (Sequence:  
499 T\*C\*C\*A\*T\*G\*A\*C\*G\*T\*T\*C\*C\*T\*G\*A\*T\*G\*C\*T (\*phosphorothioate linkage)  
500 nonmethylated cytosine-guanosine oligonucleotides was purchased from Geneworks  
501 (Thebarton, Australia). Murine and human MR1 and  $\beta$ 2-Microglobulin genes were  
502 expressed in *Escherichia coli* inclusion bodies, refolded, and purified as described  
503 previously<sup>41</sup>. MR1-5-OP-RU tetramers were generated as described previously<sup>4</sup>.

504

#### 505 Bacterial strains

506 Cultures of *Legionella pneumophila* JR32 and *Legionella longbeachae* NSW150  
507 were grown at 37°C in buffered yeast extract (BYE) broth supplemented with 30-  
508 50 $\mu$ g/ml streptomycin for 16 hour to log-phase (OD600 0.2-0.6) with shaking at 180 rpm.



509 For the infecting inoculum, bacteria were re-inoculated in prewarmed medium for a  
510 further 2–4 h culture (OD<sub>600</sub> 0.2–0.6) with the estimation that 1 OD<sub>600</sub>=5x10<sup>8</sup>/ml,  
511 sufficient bacteria were washed and diluted in phosphate buffered saline (PBS) with 2%  
512 BYE for i.n. delivery to mice. A sample of inoculum was plated onto BYCE with  
513 streptomycin for verification of bacterial concentration by counting colony-forming units.

514

515 For infection of adoptive transfer donor-mice with *Salmonella* Typhimurium  
516 BRD509 cultures were prepared as previously described<sup>13</sup>.

517

#### 518 Antibodies and flow cytometry

519 Antibodies against murine CD4 (GK1.5, APC-Cy7), CD19 (1D3, PerCP-Cy 5.5),  
520 CD45.2 (104, FITC), IFN $\gamma$  (XMG1.2, PE-Cy7), Ly6G (IA8, PECy7), TCR $\beta$  (H57-597,  
521 APC or PE), TNF- $\alpha$  (MP6-XT22, PE), GM-CSF (MP1-22E9, PE) and IL-17A (TC11-  
522 18H10, PE) were purchased from BD (Franklin Lakes, NJ). Antibodies against CD8a  
523 (53-6.7, PE), PLZF (Mags.21F7, PE), ROR $\gamma$ t (B2D, APC), T-bet (4B10, PE-Cy7) and  
524 MHCII (M5/114.15.2, AF700) were purchased from eBioscience (San Diego, CA). Abs  
525 against CD19 (6D5, BV510), F4/80 (BM8, APC), CD11b (M1/70, FITC), CD11c (N418,  
526 BV786), CD31 (PCAM, MEC13.3, PerCPCy5.5), CD62L (Mel-14, FITC), CD64 (X54-  
527 5/71, BV711), CD146 (ME-9F1, PerCPCy5.5), CD326 (G8.8, EpCAM, APC-Cy7) were  
528 purchased from Biolegend (San Diego, CA). Blocking Ab (26.5, 8F2.F9) and isotype  
529 controls (3E12, 8A5) were prepared in house. To block non-specific staining, cells were  
530 incubated with MR1-6FP tetramer and anti-Fc receptor (2.4G2) for 15 min at room  
531 temperature and then incubated at room temperature with Ab/tetramer cocktails in

532 PBS/2% fetal calf serum. 7-aminoactinomycin D (5  $\mu$ l per sample) was added for the last  
533 10 min.

534

535

536 Antibodies against human CD3 (UCHT1, PE-AlexaFluor594), TCR-V $\alpha$ 7.2 (3C10,  
537 APC), CD161 (HP-3G10, PE-Cy7), TNF- $\alpha$  (Mab11, Pacific Blue), and viability dye  
538 (Zombie Yellow) were purchased from Biolegend. Antibodies against IFN $\gamma$  (25725.11,  
539 FITC) and CD69 (FN50, PE) were purchased from BD, and anti-CD3 (UCHT1, APC)  
540 from eBioscience.

541

542 Cells were fixed with 1% paraformaldehyde prior to analysis on LSRII or LSR  
543 Fortessa or Canto II (BD Biosciences) flow cytometers. For intracellular cytokine  
544 staining Golgi plug (BD Biosciences) was used during all processing steps. Cells  
545 stimulated with PMA (phorbol 12-myristate 13-acetate;)/ionomycin (20 ng/ml, 1 $\mu$ g/ml,  
546 respectively) for 3 h at 37°C were included as positive controls. Surface staining was  
547 performed at 37°C, and cells were stained for intracellular cytokines using the BD  
548 Fixation/Permeabilization Kit (BD, Franklin Lakes, NJ) or transcription factors using the  
549 transcription buffer staining set (eBioscience) according to the manufacturers'  
550 instructions.

551

552

553 **References:**

- 554 1. Tilloy, F., *et al.* An invariant T cell receptor alpha chain defines a novel TAP-  
555 independent major histocompatibility complex class Ib-restricted alpha/beta T cell  
556 subpopulation in mammals. *J Exp Med* **189**, 1907-1921 (1999).
- 557 2. Porcelli, S., Yockey, C.E., Brenner, M.B. & Balk, S.P. Analysis of T cell antigen  
558 receptor (TCR) expression by human peripheral blood CD4-8- alpha/beta T cells  
559 demonstrates preferential use of several V beta genes and an invariant TCR alpha  
560 chain. *J Exp Med* **178**, 1-16 (1993).
- 561 3. Kjer-Nielsen, L., *et al.* MR1 presents microbial vitamin B metabolites to MAIT  
562 cells. *Nature* **491**, 717-723 (2012).
- 563 4. Corbett, A.J., *et al.* T-cell activation by transitory neo-antigens derived from  
564 distinct microbial pathways. *Nature* **509**, 361-365 (2014).
- 565 5. Eckle, S.B., *et al.* Recognition of Vitamin B Precursors and Byproducts by  
566 Mucosal Associated Invariant T Cells. *J Biol Chem* **290**, 30204-30211 (2015).
- 567 6. Le Bourhis, L., *et al.* Antimicrobial activity of mucosal-associated invariant T  
568 cells. *Nat Immunol* **11**, 701-708 (2010).
- 569 7. Riegert, P., Wanner, V. & Bahram, S. Genomics, isoforms, expression, and  
570 phylogeny of the MHC class I-related MR1 gene. *J Immunol* **161**, 4066-4077  
571 (1998).
- 572 8. Yamaguchi, H., Hirai, M., Kurosawa, Y. & Hashimoto, K. A highly conserved  
573 major histocompatibility complex class I-related gene in mammals. *Biochem*  
574 *Biophys Res Commun* **238**, 697-702 (1997).
- 575 9. Tsukamoto, K., Deakin, J.E., Graves, J.A. & Hashimoto, K. Exceptionally high  
576 conservation of the MHC class I-related gene, MR1, among mammals.  
577 *Immunogenetics* **65**, 115-124 (2013).
- 578 10. Dusseaux, M., *et al.* Human MAIT cells are xenobiotic-resistant, tissue-targeted,  
579 CD161hi IL-17-secreting T cells. *Blood* **117**, 1250-1259 (2011).
- 580 11. Hinks, T.S., *et al.* Steroid-induced Deficiency of Mucosal-associated Invariant T  
581 Cells in the COPD Lung: Implications for NTHi Infection. *Am J Respir Crit Care*  
582 *Med* **194**, 1208-1218 (2016).
- 583 12. Rahimpour, A., *et al.* Identification of phenotypically and functionally  
584 heterogeneous mouse mucosal-associated invariant T cells using MR1 tetramers.  
585 *J Exp Med* **212**, 1095-1108 (2015).
- 586 13. Chen, Z., *et al.* Mucosal-associated invariant T-cell activation and accumulation  
587 after in vivo infection depends on microbial riboflavin synthesis and co-  
588 stimulatory signals. *Mucosal immunology* (2016).
- 589 14. Meierovics, A., Yankelevich, W.J. & Cowley, S.C. MAIT cells are critical for  
590 optimal mucosal immune responses during in vivo pulmonary bacterial infection.  
591 *Proc Natl Acad Sci U S A* **110**, E3119-3128 (2013).
- 592 15. Winn, W.C., Jr. & Myerowitz, R.L. The pathology of the Legionella pneumonias.  
593 A review of 74 cases and the literature. *Hum Pathol* **12**, 401-422 (1981).
- 594 16. Garrison, L.E., *et al.* Vital Signs: Deficiencies in Environmental Control  
595 Identified in Outbreaks of Legionnaires' Disease - North America, 2000-2014.  
596 *MMWR Morb Mortal Wkly Rep* **65**, 576-584 (2016).

- 597 17. Gobin, I., Susa, M., Begic, G., Hartland, E.L. & Doric, M. Experimental  
598 Legionella longbeachae infection in intratracheally inoculated mice. *Journal of*  
599 *medical microbiology* **58**, 723-730 (2009).
- 600 18. Mak, J.Y., *et al.* Stabilizing short-lived Schiff base derivatives of 5-aminouracils  
601 that activate mucosal-associated invariant T cells. *Nature communications* **8**,  
602 14599 (2017).
- 603 19. Misch, E.A. Legionella: virulence factors and host response. *Curr Opin Infect Dis*  
604 **29**, 280-286 (2016).
- 605 20. Kanehisa, M. & Goto, S. KEGG: Kyoto encyclopedia of genes and genomes.  
606 *Nucleic acids research* **28**, 27-30 (2000).
- 607 21. Huang, S., *et al.* Evidence for MR1 antigen presentation to mucosal-associated  
608 invariant T cells. *J Biol Chem* **280**, 21183-21193 (2005).
- 609 22. Tsuchiya, S., *et al.* Establishment and characterization of a human acute  
610 monocytic leukemia cell line (THP-1). *Int J Cancer* **26**, 171-176 (1980).
- 611 23. Kupz, A., Bedoui, S. & Strugnell, R.A. Cellular requirements for systemic control  
612 of Salmonella enterica serovar Typhimurium infections in mice. *Infect Immun* **82**,  
613 4997-5004 (2014).
- 614 24. Zhan, Y., Corbett, A.J., Brady, J.L., Sutherland, R.M. & Lew, A.M. CD4 help-  
615 independent induction of cytotoxic CD8 cells to allogeneic P815 tumor cells is  
616 absolutely dependent on costimulation. *J Immunol* **165**, 3612-3619 (2000).
- 617 25. Doulatov, S., *et al.* PLZF is a regulator of homeostatic and cytokine-induced  
618 myeloid development. *Genes Dev* **23**, 2076-2087 (2009).
- 619 26. Fischer, A. & Rausell, A. Primary immunodeficiencies suggest redundancy within  
620 the human immune system. *Sci Immunol* **1**(2016).
- 621 27. Le Bourhis, L., *et al.* MAIT Cells Detect and Efficiently Lyse Bacterially-Infected  
622 Epithelial Cells. *PLoS Pathog* **9**, e1003681 (2013).
- 623 28. Meierovics, A.I. & Cowley, S.C. MAIT cells promote inflammatory monocyte  
624 differentiation into dendritic cells during pulmonary intracellular infection. *J Exp*  
625 *Med* **213**, 2793-2809 (2016).
- 626 29. Ellis, T.N. & Beaman, B.L. Interferon-gamma activation of polymorphonuclear  
627 neutrophil function. *Immunology* **112**, 2-12 (2004).
- 628 30. Chua, W.J., *et al.* Polyclonal mucosa-associated invariant T cells have unique  
629 innate functions in bacterial infection. *Infect Immun* **80**, 3256-3267 (2012).
- 630 31. Seshadri, C., *et al.* A polymorphism in human MR1 is associated with mRNA  
631 expression and susceptibility to tuberculosis. *Genes Immun* **18**, 8-14 (2017).
- 632 32. Sakala, I.G., *et al.* Functional Heterogeneity and Antimycobacterial Effects of  
633 Mouse Mucosal-Associated Invariant T Cells Specific for Riboflavin Metabolites.  
634 *J Immunol* **195**, 587-601 (2015).
- 635 33. Gold, M.C., *et al.* Human thymic MR1-restricted MAIT cells are innate pathogen-  
636 reactive effectors that adapt following thymic egress. *Mucosal immunology*  
637 (2012).
- 638 34. Martin, E., *et al.* Stepwise development of MAIT cells in mouse and human.  
639 *PLoS Biol* **7**, e54 (2009).
- 640 35. Aaby, P., *et al.* Randomized trial of BCG vaccination at birth to low-birth-weight  
641 children: beneficial nonspecific effects in the neonatal period? *J Infect Dis* **204**,  
642 245-252 (2011).

- 643 36. Cosgrove, C., *et al.* Early and nonreversible decrease of CD161<sup>++</sup> /MAIT cells in  
644 HIV infection. *Blood* **121**, 951-961 (2013).
- 645 37. Shalem, O., *et al.* Genome-scale CRISPR-Cas9 knockout screening in human  
646 cells. *Science* **343**, 84-87 (2014).
- 647 38. Schindelin, J., Rueden, C.T., Hiner, M.C. & Eliceiri, K.W. The ImageJ  
648 ecosystem: An open platform for biomedical image analysis. *Mol Reprod Dev* **82**,  
649 518-529 (2015).
- 650 39. Kawachi, I., Maldonado, J., Strader, C. & Gilfillan, S. MR1-restricted V alpha 19i  
651 mucosal-associated invariant T cells are innate T cells in the gut lamina propria  
652 that provide a rapid and diverse cytokine response. *J Immunol* **176**, 1618-1627  
653 (2006).
- 654 40. Chua, W.J., *et al.* Endogenous MHC-related protein 1 is transiently expressed on  
655 the plasma membrane in a conformation that activates mucosal-associated  
656 invariant T cells. *J Immunol* **186**, 4744-4750 (2011).
- 657 41. Patel, O., *et al.* Recognition of vitamin B metabolites by mucosal-associated  
658 invariant T cells. *Nature communications* **4**, 2142 (2013).

659

660

## 661 **Acknowledgments**

662 This research was supported by National Health and Medical Research Council of  
663 Australia (NHMRC) Program Grants 1113293, 1016629 and 606788, a Project Grant  
664 1120467 as well as a Merieux Research Grant. T.S.C.H. was supported by a Wellcome  
665 Trust Postdoctoral Research Fellowship (104553/z/14/z). A.J.C. was supported by an  
666 ARC Future Fellowship. S.B.G.E. was supported by an ARC DECRA Fellowship. J.R.  
667 was supported by an NHMRC Australia Fellowship, D.P.F. was supported by an  
668 NHMRC Senior Principal Research Fellowship. H.W. is supported by a Melbourne  
669 International Engagement Award (University of Melbourne). C.D'S. is supported by a  
670 Melbourne International Research Scholarship and a Melbourne International Fee  
671 Remission Scholarship (University of Melbourne). We thank Dr Wei-Jen Chua and Prof  
672 Ted Hansen for their kind provision of 8F2.F9 and 26.5 mAbs, and Prof David Jackson  
673 for Pam2Cys. We are grateful to Prof Francis Carbone for critical review of the  
674 manuscript.

## 675 **Author contributions**

676 HW, CDS, TSCH, XYL, LK, TLP, SBG, BSM, ZC, AWS performed the experiments  
677 and analyzed the data. ZC, TSCH, HW, JM, AC, RS designed the experiments and  
678 managed the study. NW, DPF, YI, JG, GW, LK-N, JR, LL, JYWM provided essential  
679 reagents and intellectual input. TSCH, AC, ZC, JM conceived the work and wrote the  
680 manuscript which was revised and approved by all authors.

## 681 **Competing Financial Interests**

682 Z.C., S.E., L.K-N., D.F., L.L., J.Y.W.M., J.R., J.McC., and A.C. are inventors on patents  
683 describing MR1 tetramers and MR1 ligands. The other authors declared no conflict of  
684 interest.

685

#### 686 **Materials and Correspondance**

687 Correspondence and material requests should be addressed to J McCluskey  
688 (jamesm1@unimelb.edu.au).

689 **Figures**

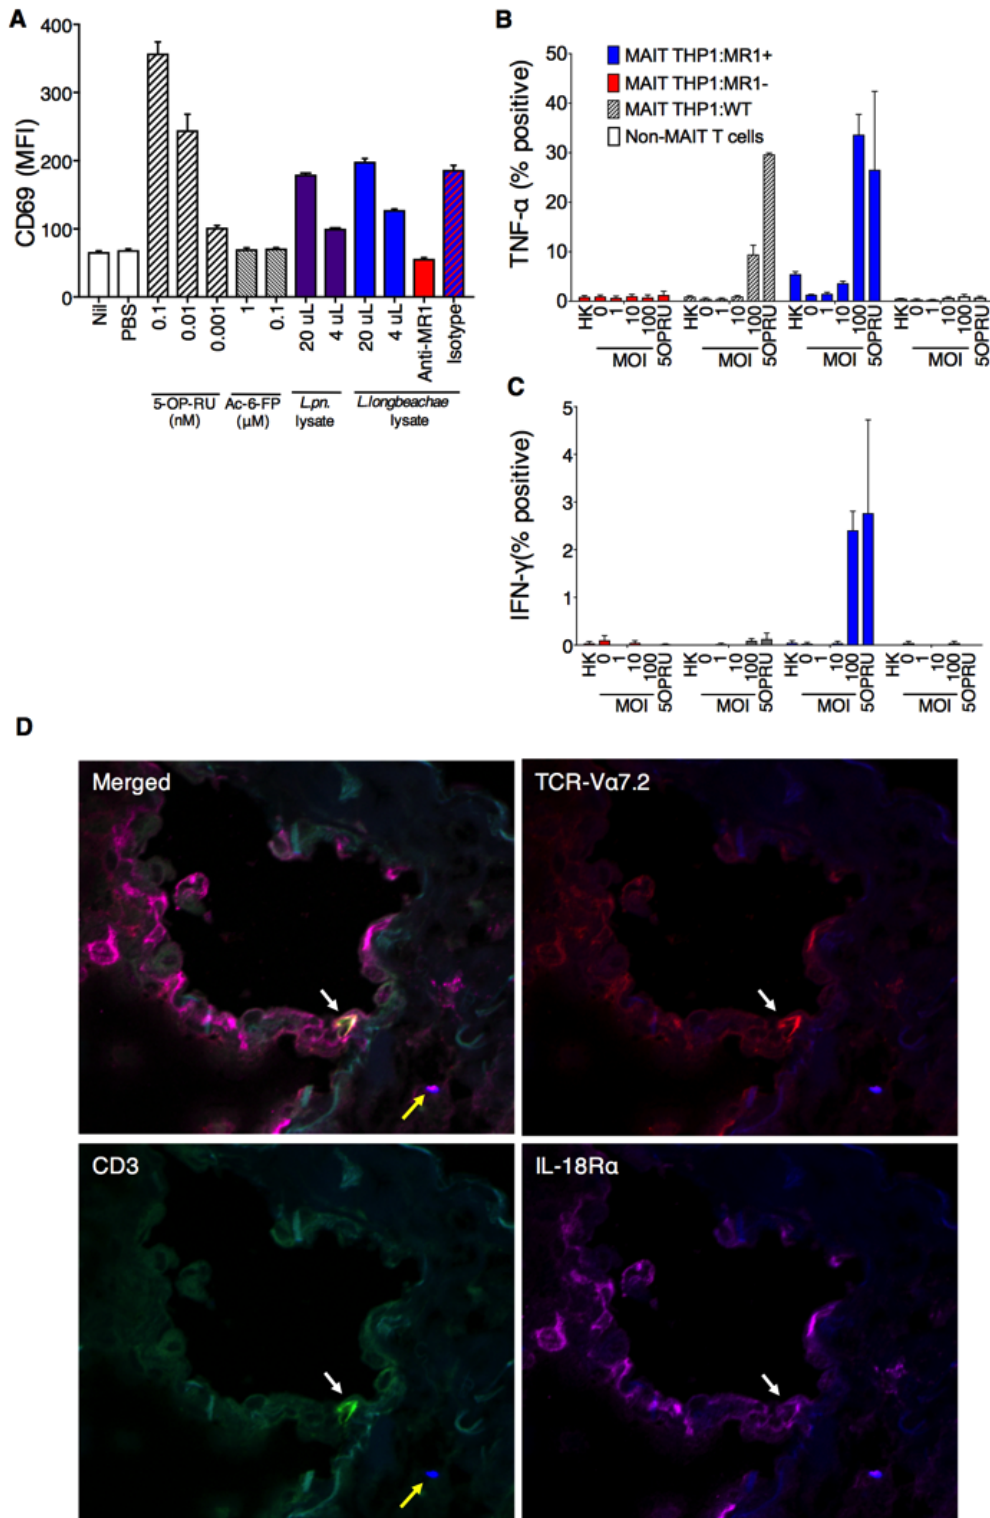

690



691 **Figure 1. Human MAIT cells are activated by *Legionella* infection via MR1 *in vitro***

692 (A) Jurkat.MAIT and C1R.MR1 cells were co-incubated for 16h with lysates of *L.*  
693 *pneumophila* (*L. pn.*) or *L. longbeachae*, or 5-OP-RU, acetyl-6-FP or PBS. Activation,  
694 detected by staining with anti-CD69, is enhanced by bacterial lysate or by the activating  
695 ligand 5-OP-RU, but not by acetyl-6-FP. Activation was blocked by anti-MR1 antibody  
696 (26.5) but not by isotype control (W6/32) 2h prior to co-incubation. (B-C) THP1 cells  
697 (WT) or THP1 cells overexpressing MR1 (THP1:MR1+, blue) or deficient in expression  
698 of MR1 (THP1:MR1-, red) were infected for 27h with *L. longbeachae*, heat killed (HK)  
699 *L. longbeachae* (MOI100) or 10nM 5-OP-RU, then co-cultured for 16h with  
700 CD3<sup>+</sup>V $\alpha$ 7.2<sup>+</sup>CD161<sup>+</sup> human peripheral blood MAIT cells, or MAIT-depleted  
701 conventional T cells. MR1-5-OP-RU-tetramer<sup>+</sup> MAIT cell activation was measured by  
702 intracellular cytokine staining for (B) TNF- $\alpha$  or (C) IFN- $\gamma$ . (D) Immunofluorescence  
703 micrographs showing CD3<sup>+</sup>TCRV $\alpha$ 7.2<sup>+</sup>IL-18R $\alpha$ <sup>+</sup> MAIT cell (white arrow) within  
704 healthy human lung tissue 24h post infection *ex vivo* with *L. longbeachae* (yellow arrow).  
705 Red, TCR-V $\alpha$ 7.2; green, CD3; magenta, IL-18R $\alpha$ ; blue, legionella. Data show MFI or  
706 percentage cytokine-positive cells with SEM.

707

708

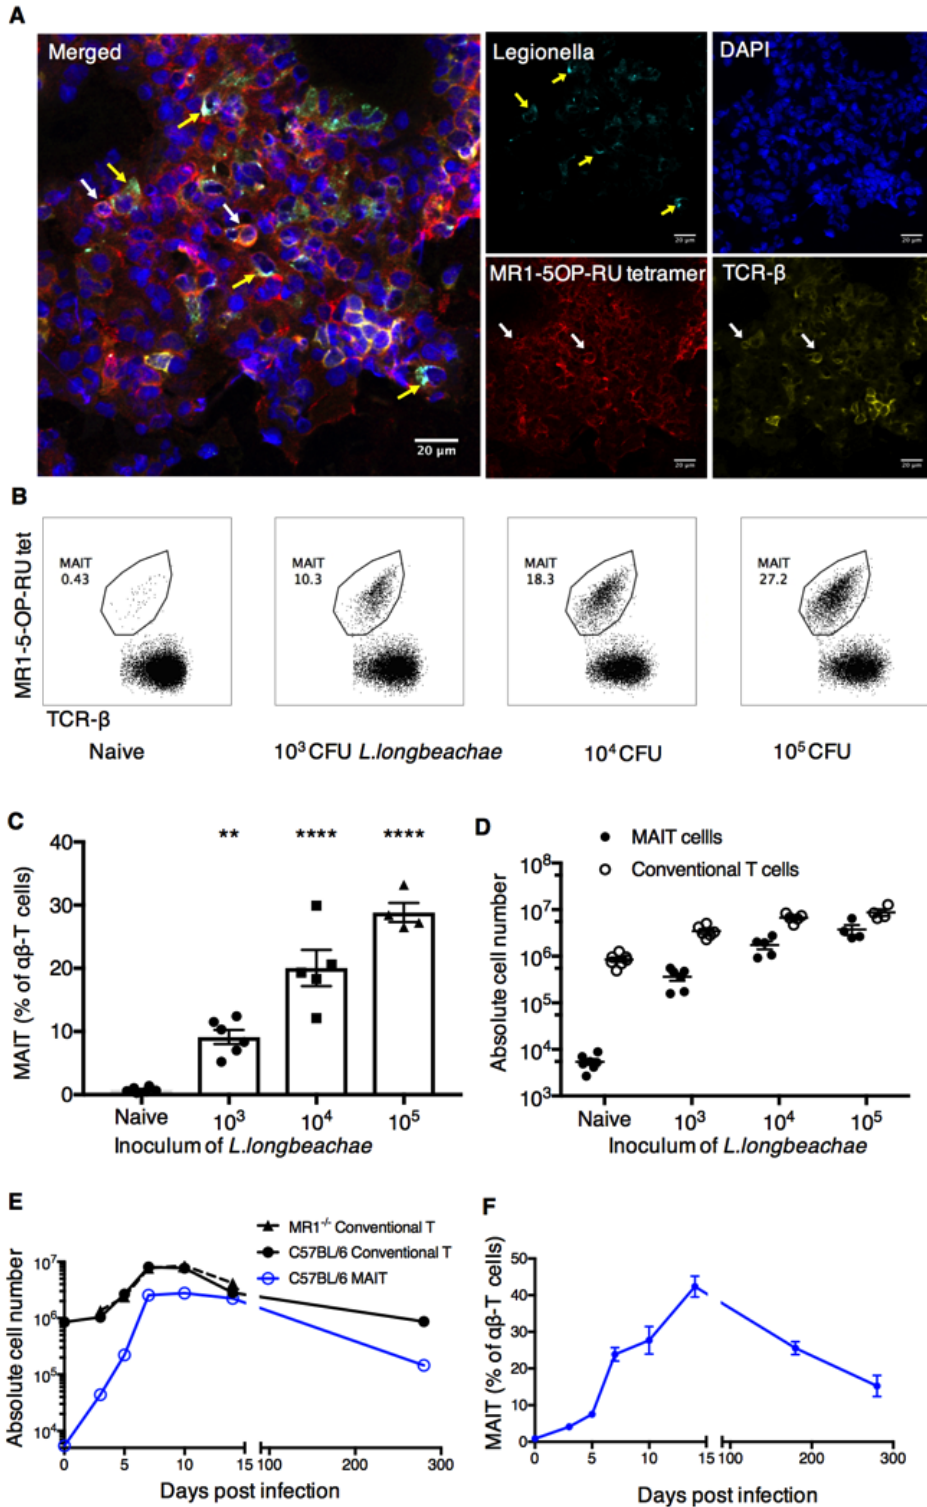

709

710 **Figure 2. Murine pulmonary infection with *Legionella* induces long-lasting**  
 711 **expansion of MAIT cells *in vivo***

712 (A) Immunofluorescence micrographs of murine lungs showing TCR $\beta$ +MR1-5-OP-RU-  
713 tetramer+ MAIT cells (white arrows) adjacent to infected cells (yellow arrows) within  
714 parenchyma four days after intranasal infection with  $2 \times 10^4$  CFU *L. longbeachae* in  
715 C57BL/6 mice which had been challenged with the same inoculum 5 months previously.  
716 (B) Flow-cytometry plots showing MAIT cell percentage among TCR $\beta$ + lymphocytes in  
717 the lungs of C57BL/6 mice either uninfected or infected with  $10^3$ ,  $10^4$  or  $10^5$  CFU *L.*  
718 *longbeachae* for 7 days. Relative (C) and absolute (D) numbers of MAIT cells and  
719 conventional  $\alpha\beta$  T cells 7 days post infection. Absolute numbers (E), and relative  
720 percentages (F) of MR1-tetramer+ MAIT cells or conventional  $\alpha\beta$  T cells in C57BL/6  
721 and MR1<sup>-/-</sup> mice after intranasal infection with  $2 \times 10^4$  CFU *L. longbeachae*. Experiments  
722 used 4-6 mice per group (mean $\pm$ SEM) and were performed twice with similar results. B6,  
723 C57BL/6 mice; CFU, colony forming units; DAPI, 4',6-diamidino-2-phenylindole.  
724 Statistical tests C: \*\* Dunnett's  $P < 0.01$ , \*\*\*\*  $P < 0.0001$ ; C all comparisons with the  
725 respective naïve groups  $P < 0.0001$  for Dunnett's on log transformed data. See also  
726 Figures S1, S2.

727

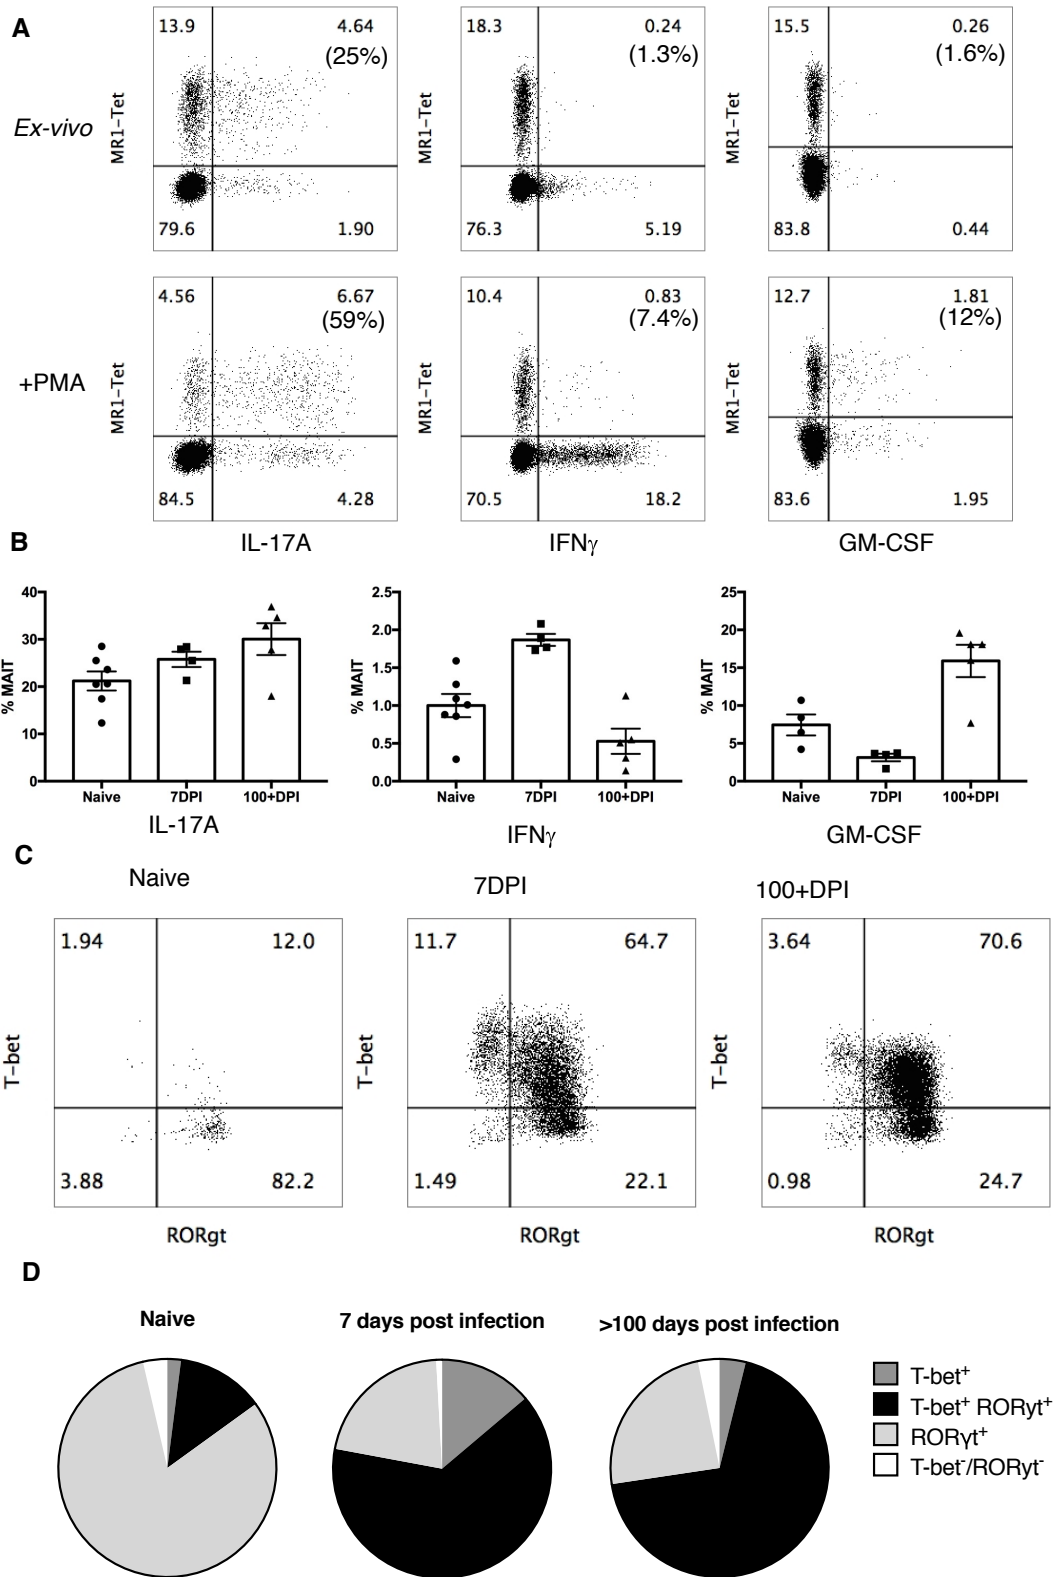

729 **Figure 3. Profiles of MAIT cell cytokine expression and nuclear transcription**  
730 **factors vary over the course of pulmonary *Legionella* infection**

731 (A) Flow cytometry plots showing intracellular staining for IL-17A, IFN- $\gamma$  and GM-CSF  
732 by pulmonary TCR $\beta$  lymphocytes (non-MAIT conventional and MAIT cells) after 4h  
733 culture with or without PMA/ionomycin with bredeldin A. TCR $\beta$ <sup>+</sup> lymphocytes were  
734 harvested from lungs of C57BL/6 mice infected with  $2 \times 10^4$  CFU *L. longbeachae* for 7  
735 days. Percentages in brackets represent the proportion of MR1-tetramer positive MAIT  
736 cells expressing cytokine. (B) Percentages of pulmonary MAIT cells producing IL-17A,  
737 IFN- $\gamma$  or GM-CSF by intracellular staining, directly *ex-vivo* from C57BL/6 mice infected  
738 for 0, 7 or >100 days with  $2 \times 10^4$  CFU *L. longbeachae*. Experiments using 4-7 mice per  
739 group (mean $\pm$ SEM) were performed twice with similar results. (C) Expression of T-bet  
740 and ROR $\gamma$ t in MAIT cells from uninfected or infected C57BL/6 mice 7 or >100 days post  
741 infection (DPI). (D) Average proportion of T-bet<sup>+</sup>, double positive (DP), ROR $\gamma$ t<sup>+</sup> and  
742 double negative (DN) MAIT cells from uninfected or infected C57BL/6 mice at indicated  
743 date. Mean values are representative of 5-8 mice in each group. See also Figure S3.

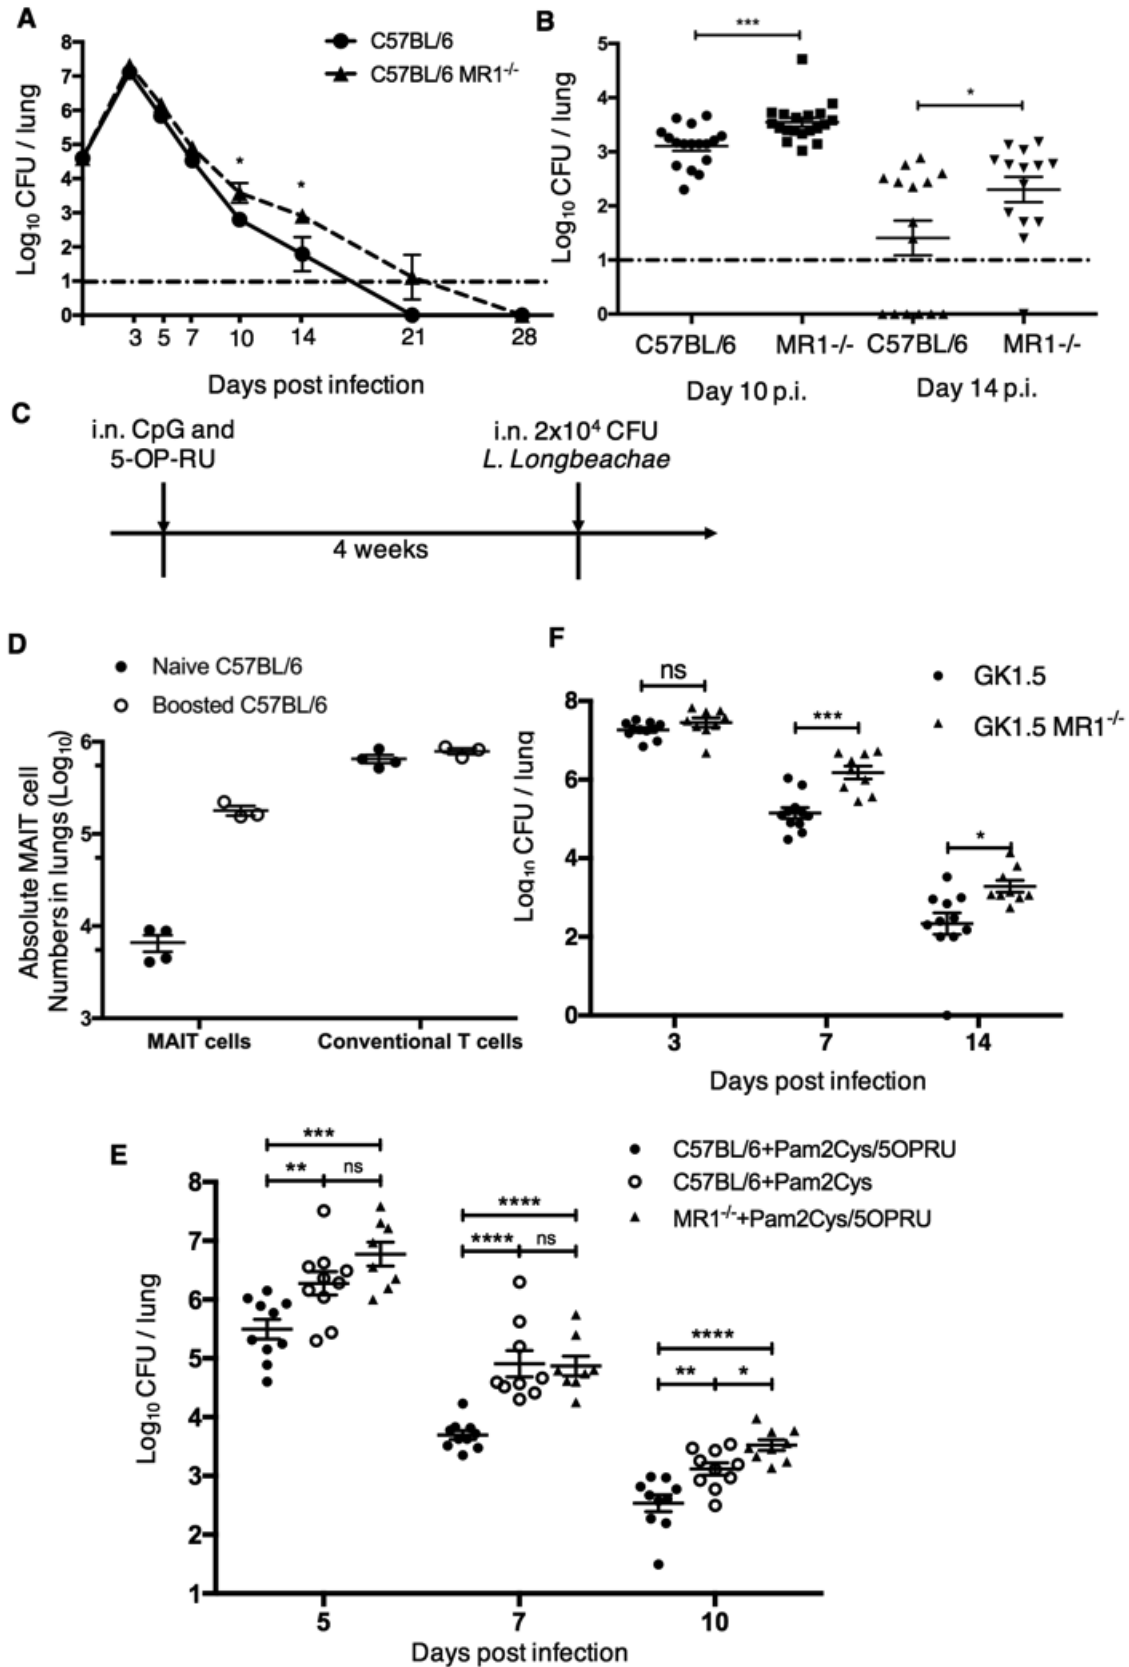

745 **Figure 4. MAIT cells contribute to protection in murine *Legionella* infection in vivo,**  
746 **which can be accelerated by prior ligand-induced MAIT cell expansion**

747 (A,B). Bacterial load (CFU) in lungs C57BL/6 or MR1<sup>-/-</sup> mice following intranasal  
748 infection with 2x10<sup>4</sup> CFU *L. longbeachae*. Dashed line represents limit of detection. (A)  
749 Bacterial load over the time-course of infection. (B). Bacterial load at days 10 and 14  
750 post infection, from further three separate replicates. (C). Schematic for panel D and E:  
751 C57BL/6 or MR1<sup>-/-</sup> mice were treated with 20nmol S-[2,3-bis(palmitoyloxy)propyl]  
752 cysteine (Pam2Cys) and 76pmol 5-OP-RU (in 50μl) intranasally 1 month before 2x10<sup>4</sup>  
753 CFU *L. longbeachae* inoculation. (D) Absolute numbers of MAIT cells and conventional  
754 T cells from lungs of naïve or ligand-boosted C57BL/6 mice 30 days after administration  
755 of ligand. (E) Differences in bacterial load in lungs of C57BL/6 or ligand-boosted  
756 C57BL/6 or MR1<sup>-/-</sup> mice apparent at 5, 7 and 10 DPI. (F) Bacterial load in lungs of mice  
757 lacking CD4<sup>+</sup> cells (GK1.5Tg) or CD4<sup>+</sup> and MAIT cells (GK1.5Tg.MR1<sup>-/-</sup>) 3, 7 and 14  
758 days after infection with 2x10<sup>4</sup> CFU i.n. *L. longbeachae*. Pooled data (mean±SEM) from  
759 two replicates with similar results using 5-6 mice per group, compared using t tests on  
760 log-transformed data. \*, P<0.05; \*\*, P<0.01; \*\*\*, P<0.001; \*\*\*\* P<0.0001.

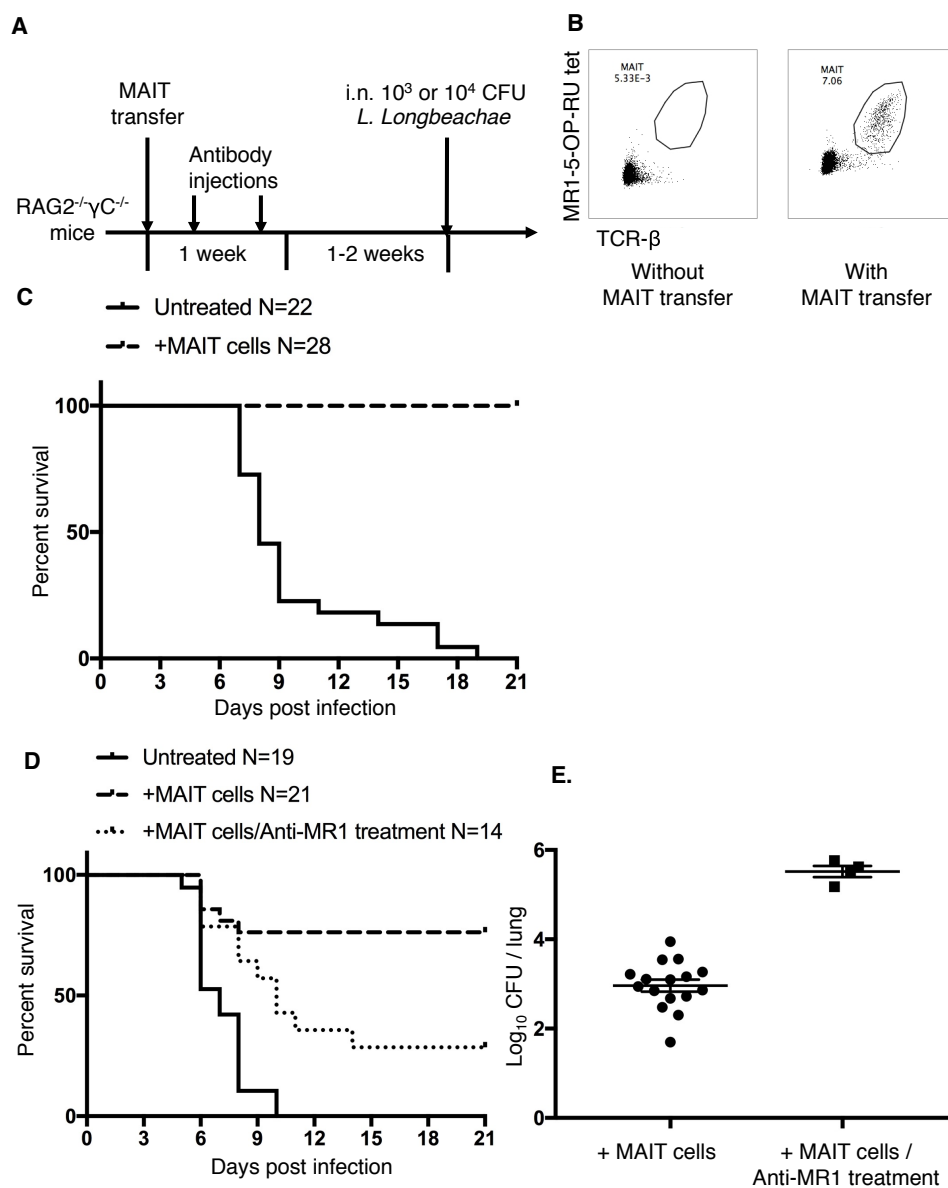

761

762 **Figure 5. Adoptive transfer of MAIT cells rescues Rag2<sup>-/-</sup>γC<sup>-/-</sup> mice from fatal**  
 763 **pulmonary *Legionella* infection**

764 (A) Schematic of protocol: 10<sup>5</sup> pulmonary MAIT cells from C57BL/6 mice previously  
 765 infected with 10<sup>6</sup> CFU *S. Typhimurium* BRD509 for 7 days to expand the MAIT cell  
 766 population were sorted and transferred intravenously into Rag2<sup>-/-</sup>γC<sup>-/-</sup> mice, followed by



767 intraperitoneal anti-CD4 and anti-CD8 antibody injection (0.1mg each) twice within 1  
768 week to deplete contaminating conventional T cells. After 2 weeks, mice were infected  
769 with  $10^3$  or  $10^4$  CFU i.n. of *L. longbeachae*. **(B)** Representative plots showing live  
770 (7AAD-) hematopoietic (CD45.2+) cells with percentages of MAIT cells in the lungs of  
771 Rag2-/- $\gamma$ C-/- mice which were untreated or were recipients of adoptively-transferred  
772 MAIT cells. **(C)** Survival of *Legionella*-infected untreated or MAIT cell-recipient Rag2-  
773 /- $\gamma$ C-/- mice after  $10^3$  CFU i.n. *L. longbeachae* infection. **(D)** Survival of *Legionella*-  
774 infected untreated or MAIT cell-recipient Rag2-/- $\gamma$ C-/- mice after  $10^4$  CFU i.n. *L.*  
775 *longbeachae*, with or without MR1 blockade. One group received 0.25mg anti-MR1  
776 monoclonal antibody alternate days after infection. **(E)** Pulmonary bacterial load in  
777 surviving Rag2-/- $\gamma$ C-/- mice in (D) 23 DPI. Pooled data (mean $\pm$ SEM) from two replicates  
778 with similar results, each with 7-12 mice per group. See also Figure S5.

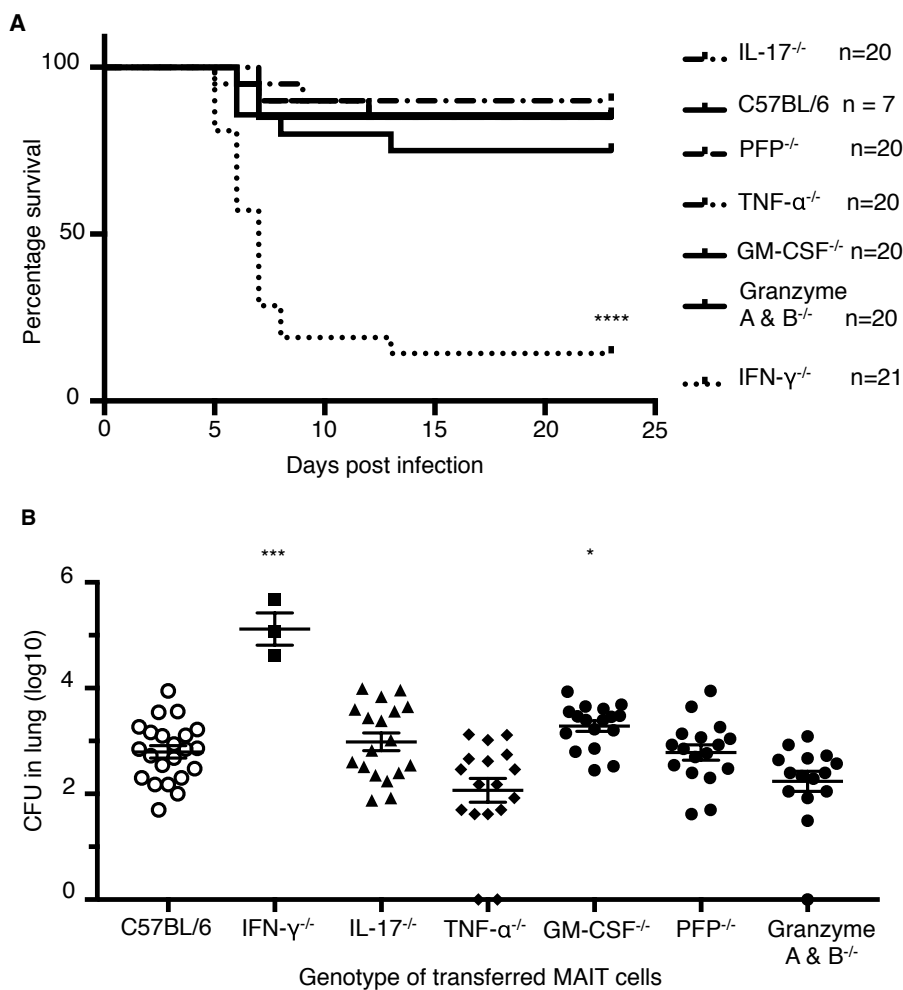

779

780

781 **Figure 6. Protection of Rag2<sup>-/-</sup>γC<sup>-/-</sup> mice from fatal pulmonary *Legionella* infection**

782 **is dependent on IFN-γ**

783 (A) Survival of Rag2<sup>-/-</sup>γC<sup>-/-</sup> mice adoptively transferred with pulmonary MAIT cells

784 generated in different mouse strains after 10<sup>4</sup> CFU i.n. *L. longbeachae*. \*\*\*\*, Gehan-

785 Breslow-Wilcoxon P<0.0001. (B) Pulmonary bacterial load in surviving Rag2<sup>-/-</sup>γC<sup>-/-</sup>

786 mice in (A) 23 DPI. Pooled data (mean±SEM) from two replicates with similar results,

787 each with 7-13 mice per group. Fig B shows mean. PFP, perforin. Bonferroni-corrected t-  
788 tests \*, P<0.05; \*\*, P<0.01; \*\*\*, P<0.001.

789

790 **Supplementary Information**

791 Supplementary Figures S1-S5

792
